# Supplementary material for: Hydroquinone/quinone electro- and photochemical interconversion in isolable polypyridylruthenium(ii) complexes
Source: Royal Society of Chemistry journal article supplement (doi:10.1039/d1dt00678a), 2021-01-01
Supplement: d1dt00678a1.pdf [file d1dt00678a1.pdf]

**Electronic Supporting Information for:**

**Hydroquinone/quinone electro- and photochemical interconversion in isolable polypyridylruthenium(II) complexes**

Dai Oyama,<sup>\*a</sup> Takatoshi Kanno<sup>b</sup> and Tsugiko Takase<sup>a</sup>

<sup>a</sup> *Department of Natural Sciences and Informatics, Fukushima University, 1 Kanayagawa, Fukushima 960-1296, Japan*

<sup>b</sup> *Graduate School of Science and Engineering, Fukushima University, 1 Kanayagawa, Fukushima 960-1296, Japan*

E-mail: daio@sss.fukushima-u.ac.jp (D. Oyama)

**Table of Contents**

|            |         |
|------------|---------|
| Table S1   | page 2  |
| Table S2   | page 3  |
| Table S3   | page 3  |
| Figure S1  | page 4  |
| Figure S2  | page 5  |
| Figure S3  | page 6  |
| Figure S4  | page 7  |
| Figure S5  | page 8  |
| Figure S6  | page 9  |
| Figure S7  | page 10 |
| Figure S8  | page 11 |
| Figure S9  | page 12 |
| Figure S10 | page 13 |
| Figure S11 | page 14 |

**Table S1.** Crystallographic data for **HQ\_AN** and **Q\_AN**.

|                                                             | <b>HQ_AN</b>                                                                                       | <b>Q_AN</b>                                                                                     |
|-------------------------------------------------------------|----------------------------------------------------------------------------------------------------|-------------------------------------------------------------------------------------------------|
| Chemical formula                                            | C <sub>33.25</sub> H <sub>28</sub> F <sub>12</sub> N <sub>6</sub> O <sub>3</sub> P <sub>2</sub> Ru | C <sub>35</sub> H <sub>27</sub> F <sub>12</sub> N <sub>7</sub> O <sub>2</sub> P <sub>2</sub> Ru |
| Formula weight                                              | 950.62                                                                                             | 968.64                                                                                          |
| Temperature (K)                                             | 293                                                                                                | 93                                                                                              |
| Crystal system                                              | monoclinic                                                                                         | triclinic                                                                                       |
| Space group                                                 | <i>C2/c</i>                                                                                        | <i>P-1</i>                                                                                      |
| <i>a</i> (Å)                                                | 12.4452(2)                                                                                         | 8.9275(11)                                                                                      |
| <i>b</i> (Å)                                                | 12.9054(2)                                                                                         | 9.3122(12)                                                                                      |
| <i>c</i> (Å)                                                | 49.4032(7)                                                                                         | 22.021(3)                                                                                       |
| $\alpha$ (°)                                                | 90                                                                                                 | 86.863(2)                                                                                       |
| $\beta$ (°)                                                 | 92.6880(10)                                                                                        | 87.394(3)                                                                                       |
| $\gamma$ (°)                                                | 90                                                                                                 | 87.946(2)                                                                                       |
| <i>V</i> (Å <sup>3</sup> )                                  | 7925.9(2)                                                                                          | 1825.0(4)                                                                                       |
| <i>Z</i>                                                    | 8                                                                                                  | 2                                                                                               |
| Calcd density (g/cm <sup>3</sup> )                          | 1.593                                                                                              | 1.763                                                                                           |
| $\mu$ (Mo <i>K</i> $\alpha$ ) (mm <sup>-1</sup> )           | 0.575                                                                                              | 0.625                                                                                           |
| No. unique reflns                                           | 11354                                                                                              | 8276                                                                                            |
| No. obsd reflns                                             | 9368                                                                                               | 6652                                                                                            |
| Refinement method                                           | <i>Full-matrix least-squares on F<sup>2</sup></i>                                                  |                                                                                                 |
| Parameters                                                  | 640                                                                                                | 534                                                                                             |
| <i>R</i> [ <i>I</i> > 2 $\sigma$ ( <i>I</i> )] <sup>1</sup> | 0.0876                                                                                             | 0.0902                                                                                          |
| <i>wR</i> (all data) <sup>2</sup>                           | 0.2020                                                                                             | 0.2449                                                                                          |
| <i>S</i>                                                    | 1.276                                                                                              | 1.110                                                                                           |

<sup>1</sup>  $R = \Sigma(|F_o| - |F_c|) / \Sigma|F_o|$ ; <sup>2</sup>  $wR = \{\Sigma_w(F_o^2 - F_c^2)^2 / \Sigma_w(F_o^2)\}^{1/2}$ .

**Table S2.** Hydrogen-bond geometry (Å, °) for **HQ\_AN**.

| $D-H\cdots A$                      | $D-H$ | $H\cdots A$ | $D\cdots A$ | $D-H\cdots A$ |
|------------------------------------|-------|-------------|-------------|---------------|
| O1–H1 $\cdots$ O2 <sup>i</sup>     | 0.82  | 1.96        | 2.765(8)    | 169           |
| O2–H2 $\cdots$ O5                  | 0.82  | 1.94        | 2.730(15)   | 161           |
| O2–H2 $\cdots$ O5 <sup>ii</sup>    | 0.82  | 1.96        | 2.779(15)   | 179           |
| O5–H5A $\cdots$ O2 <sup>ii</sup>   | 0.85  | 2.23        | 2.779(15)   | 123           |
| C2–H2A $\cdots$ F1A <sup>iii</sup> | 0.93  | 2.46        | 3.258(17)   | 144           |
| C2–H2A $\cdots$ F3 <sup>iii</sup>  | 0.93  | 2.54        | 3.218(17)   | 130           |
| C5–H5 $\cdots$ F10A                | 0.93  | 2.38        | 3.19(2)     | 146           |
| C12–H12 $\cdots$ O1                | 0.93  | 2.46        | 2.819(7)    | 103           |
| C24–H24 $\cdots$ F3A <sup>iv</sup> | 0.93  | 2.54        | 3.38(2)     | 151           |
| C29–H29 $\cdots$ F10 <sup>i</sup>  | 0.93  | 2.44        | 3.20(3)     | 139           |
| C33–H33C $\cdots$ F7 <sup>v</sup>  | 0.96  | 2.54        | 3.44(2)     | 157           |

Symmetry codes: (i)  $3/2-x, 1/2+y, 3/2-z$ . (ii)  $1-x, y, 3/2-z$ . (iii)  $1/2+x, -1/2+y, z$ . (iv)  $-x, 1-y, 1-z$ . (v)  $-1/2+x, 1/2+y, z$ .

**Table S3.** Hydrogen-bond geometry (Å, °) for **Q\_AN**.

| $D-H\cdots A$                      | $D-H$ | $H\cdots A$ | $D\cdots A$ | $D-H\cdots A$ |
|------------------------------------|-------|-------------|-------------|---------------|
| C1–H4 $\cdots$ F4 <sup>i</sup>     | 0.95  | 2.53        | 3.181(16)   | 126           |
| C2–H5 $\cdots$ F2 <sup>i</sup>     | 0.95  | 2.43        | 3.310(13)   | 154           |
| C3–H6 $\cdots$ O1 <sup>ii</sup>    | 0.95  | 2.43        | 3.379(9)    | 175           |
| C9–H9 $\cdots$ O2                  | 0.95  | 2.34        | 2.828(8)    | 112           |
| C12–H10 $\cdots$ F8 <sup>iii</sup> | 0.95  | 2.46        | 3.400(13)   | 169           |
| C17–H14 $\cdots$ N7 <sup>ii</sup>  | 0.95  | 2.46        | 3.391(12)   | 168           |
| C20–H16 $\cdots$ F10 <sup>iv</sup> | 0.95  | 2.40        | 3.110(11)   | 132           |
| C31–H17 $\cdots$ F2 <sup>v</sup>   | 0.95  | 2.52        | 3.181(16)   | 127           |
| C31–H17 $\cdots$ N6                | 0.95  | 2.60        | 3.154(13)   | 118           |
| C25–H21 $\cdots$ F3 <sup>vi</sup>  | 0.95  | 2.44        | 3.34(2)     | 156           |
| C35–H25 $\cdots$ F10               | 0.98  | 2.46        | 3.352(15)   | 151           |
| C35–H26 $\cdots$ F9 <sup>vii</sup> | 0.98  | 2.31        | 3.271(17)   | 167           |

Symmetry codes: (i)  $x, -1+y, z$ . (ii)  $1-x, 1-y, 1-z$ . (iii)  $-1+x, -1+y, z$ . (iv)  $-x, 2-y, 1-z$ . (v)  $-1+x, y, z$ . (vi)  $1-x, 2-y, -z$ . (vii)  $1-x, 2-y, 1-z$ .

(a)

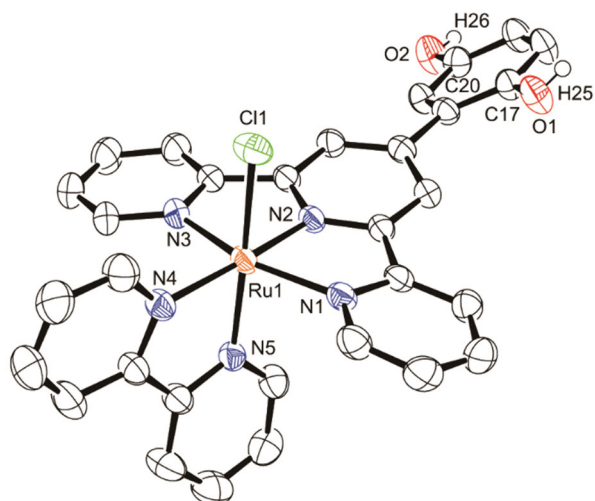

(b)

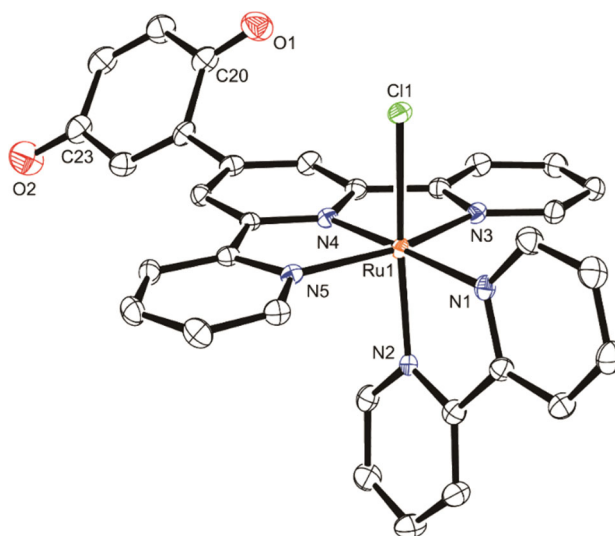

**Figure S1.** ORTEP views of (a) HQ-Cl and (b) Q-Cl. Ellipsoids are shown at the 50% probability level. Counteranions, solvent molecules and hydrogen atoms, with the exception of the OH hydrogens, are removed for clarity (D. Oyama, M. Kido, R. Abe and T. Takase, *ChemistrySelect*, 2017, 2, 2583–2587.)

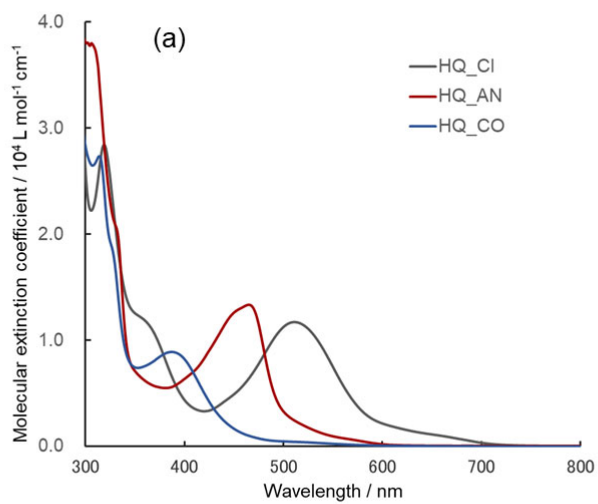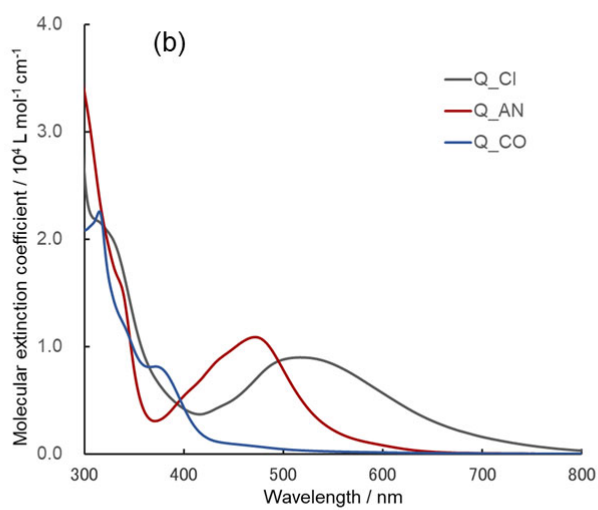

**Figure S2.** Electronic absorption spectra of (a) **HQ**-complexes and (b) **Q**-complexes in acetonitrile ( $c = 1.0 \times 10^{-4} \text{ M}$ ).

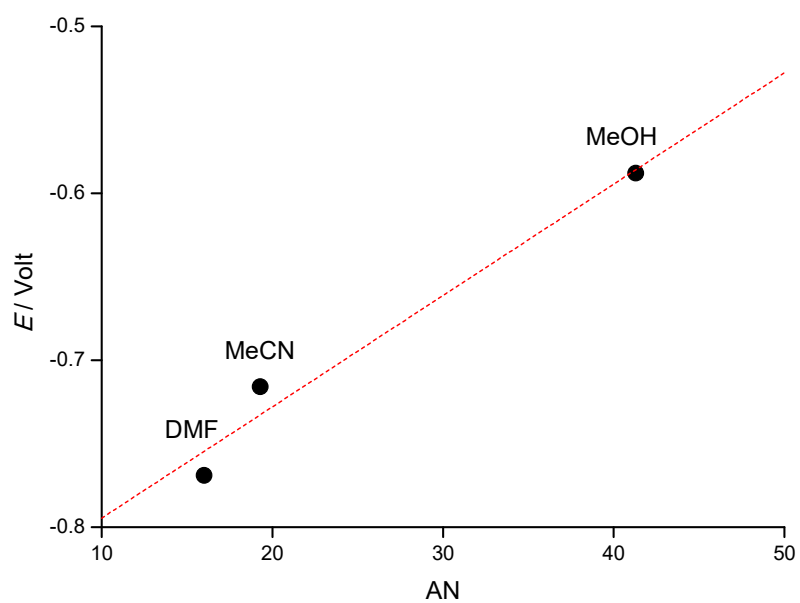

**Figure S3.** Correlations of the reduction potentials ( $E_{\text{pc1}}$ ) of **Q\_Cl** with solvent acceptor numbers (AN).

(a)

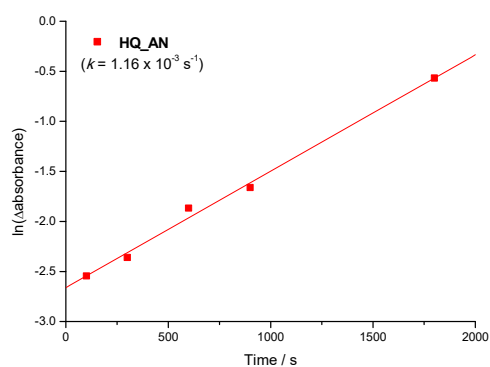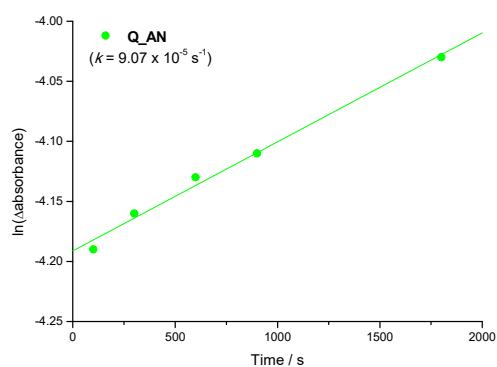

(b)

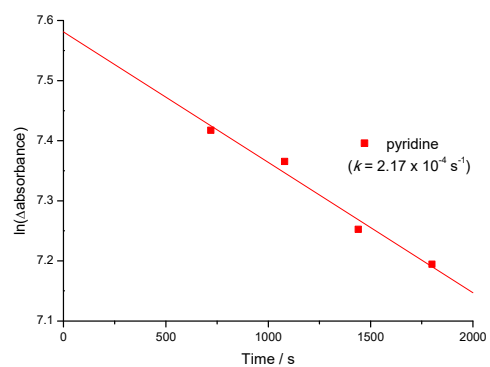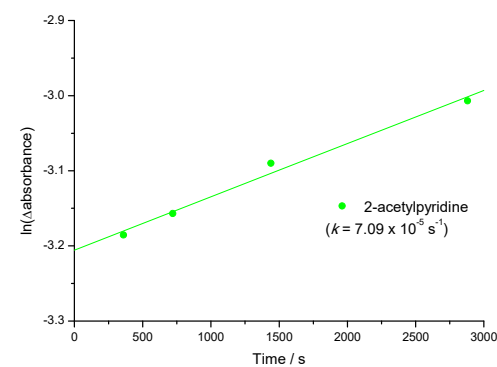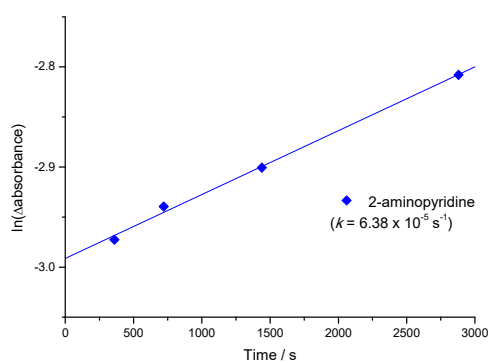

**Figure S4.** First-order plots of the photoinduced substitution reactions of (a) HQ\_AN or Q\_AN ( $c = 1.0 \times 10^{-4} \text{ M}$ ) with acetone, (b) HQ\_AN ( $c = 1.0 \times 10^{-4} \text{ M}$ ) with pyridine derivatives in  $\text{CH}_3\text{CN}$  at 298 K.

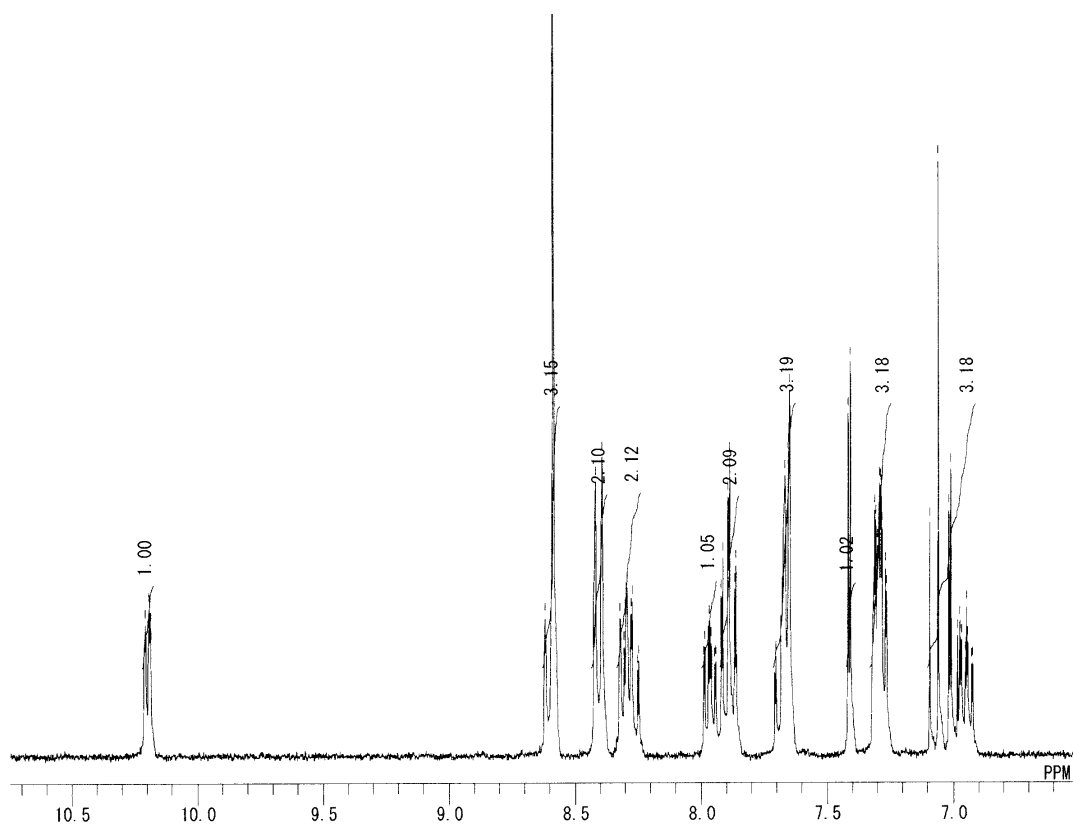

**Figure S5.** <sup>1</sup>H NMR spectrum of Q-Cl in CD<sub>3</sub>CN.



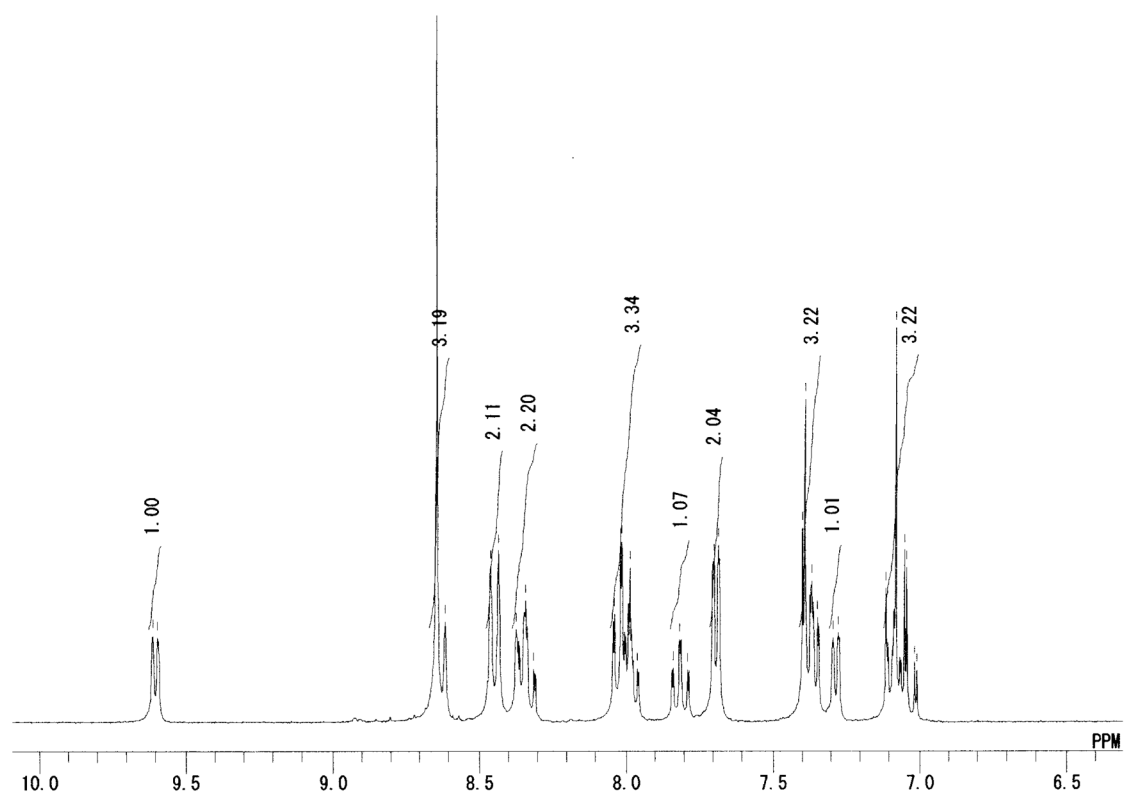

**Figure S6.**  $^1\text{H}$  NMR spectrum of Q\_AN in  $\text{CD}_3\text{CN}$ .

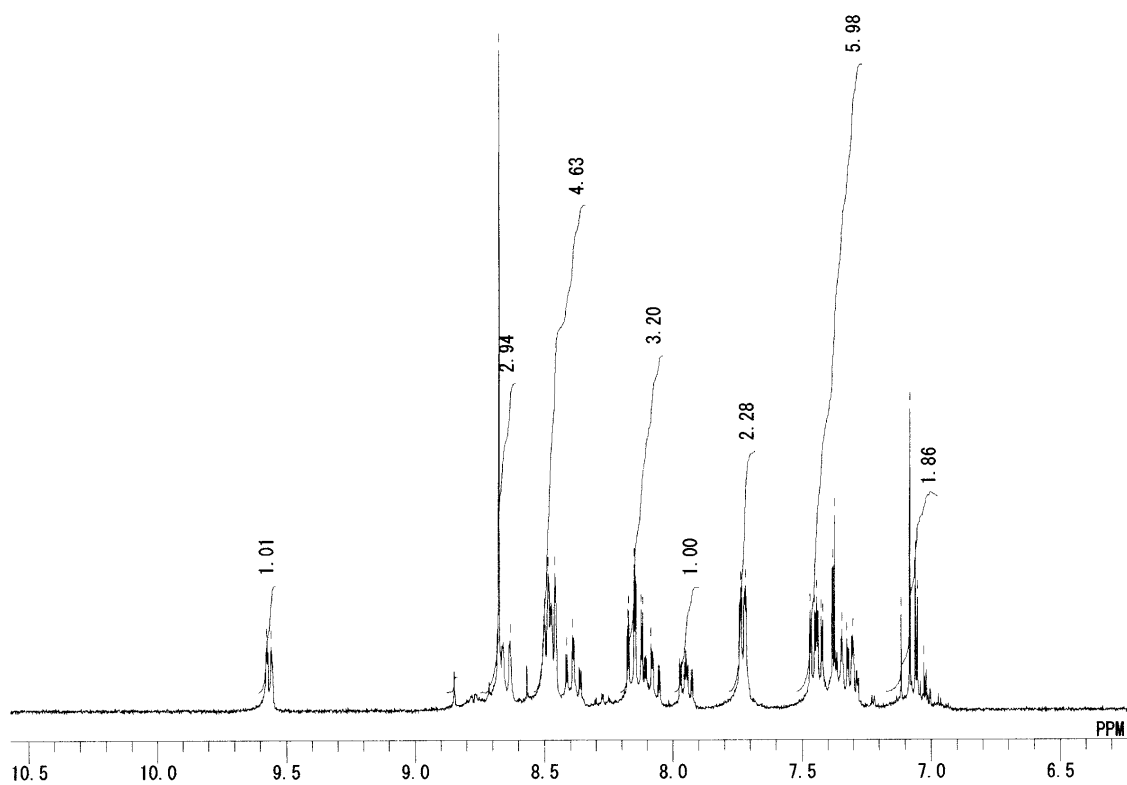

**Figure S7.**  $^1\text{H}$  NMR spectrum of  $\text{Q\_CO}$  in  $\text{CD}_3\text{CN}$ .

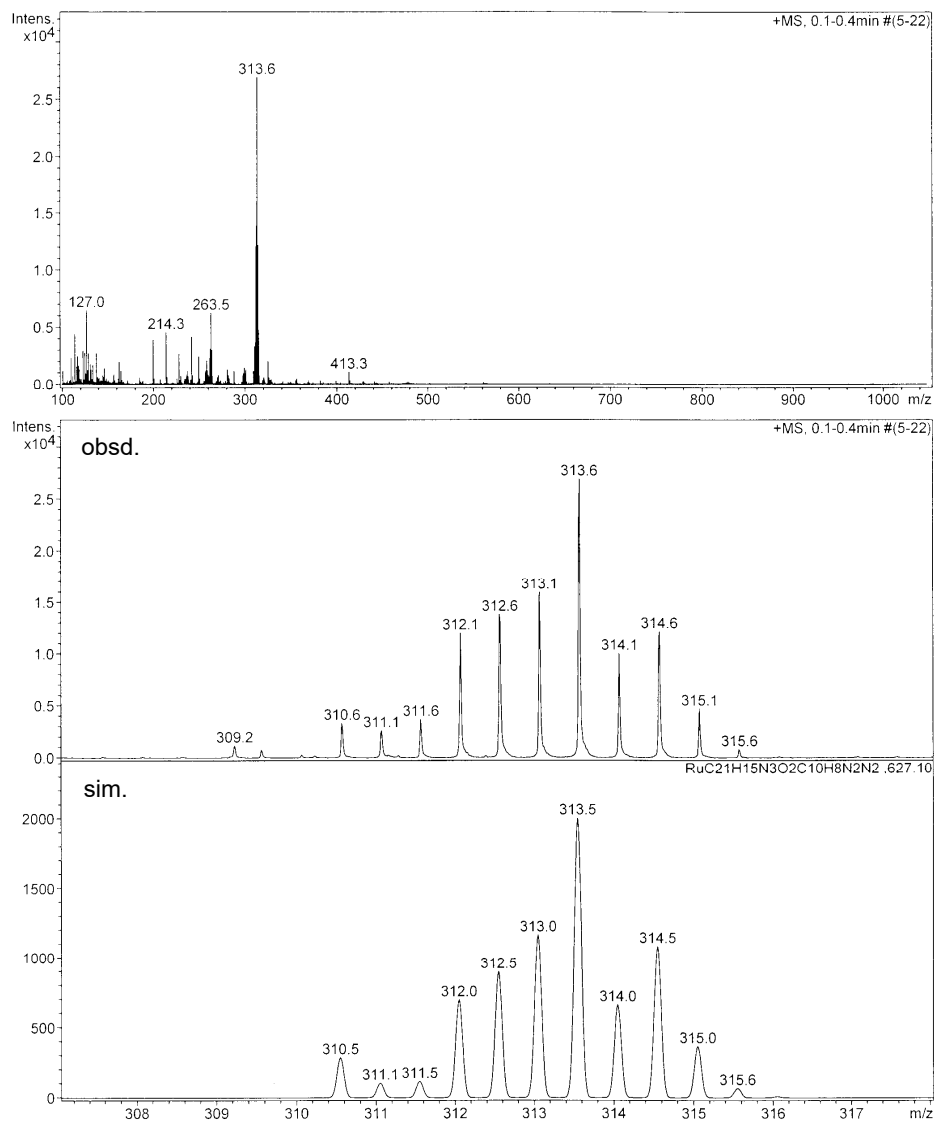

**Figure S8.** ESI mass spectrum of HQ\_AN (positive mode, CH<sub>3</sub>CN).

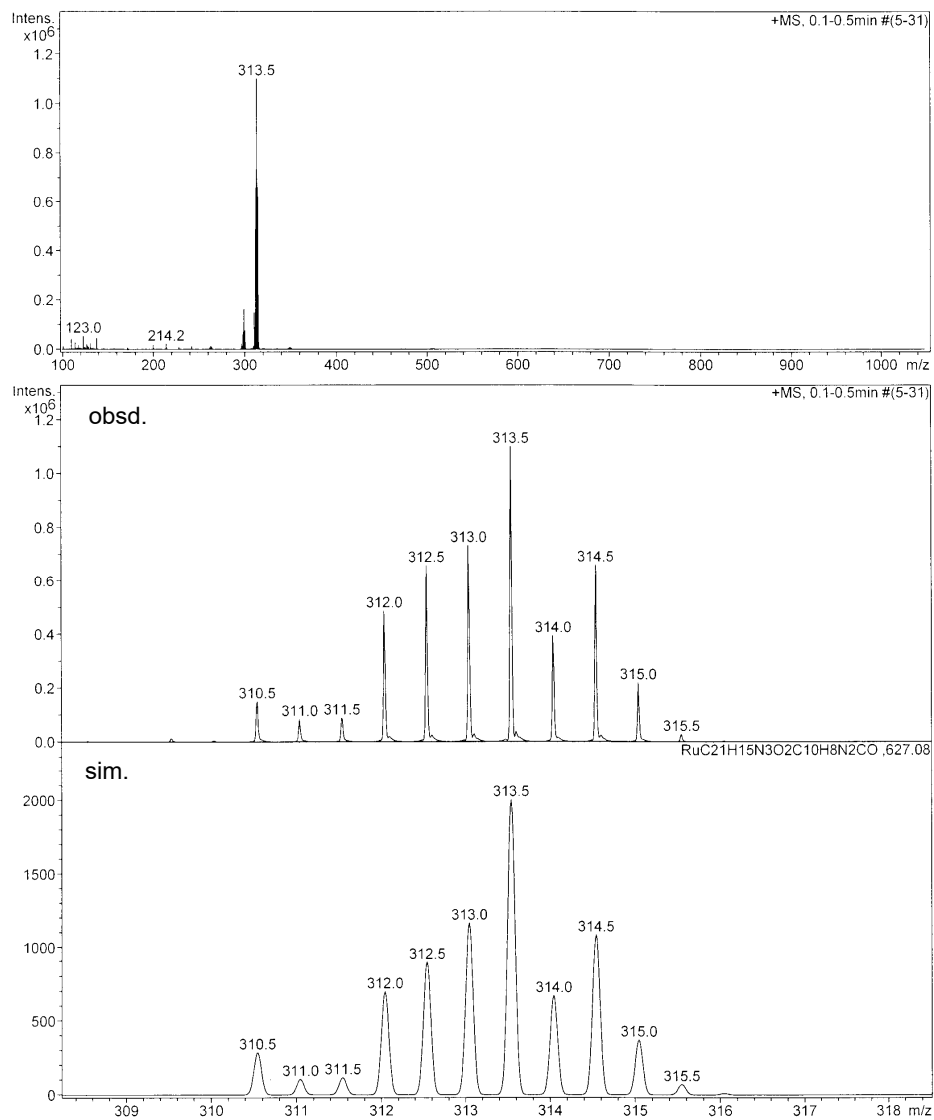

**Figure S9.** ESI mass spectrum of HQ\_CO (positive mode, CH<sub>3</sub>CN).

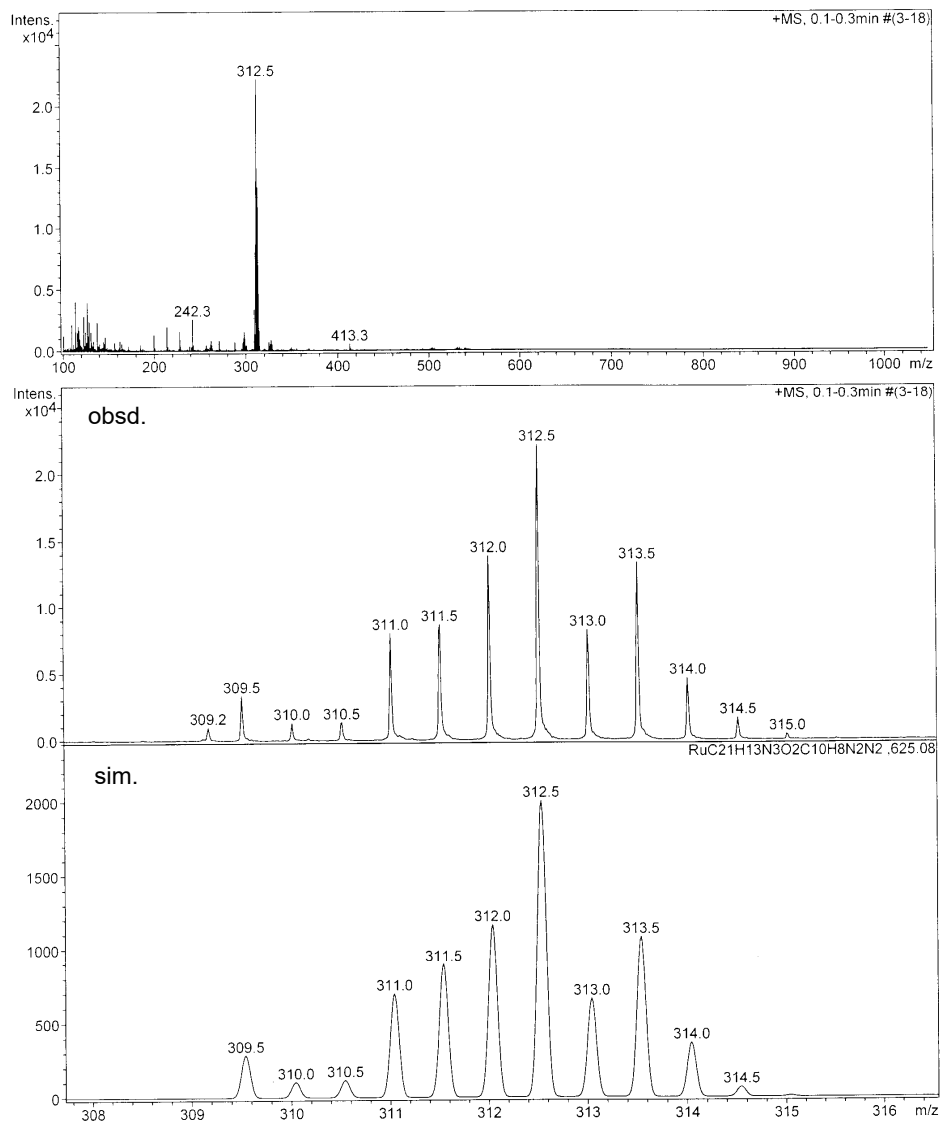

**Figure S10.** ESI mass spectrum of Q\_AN (positive mode, CH<sub>3</sub>CN).

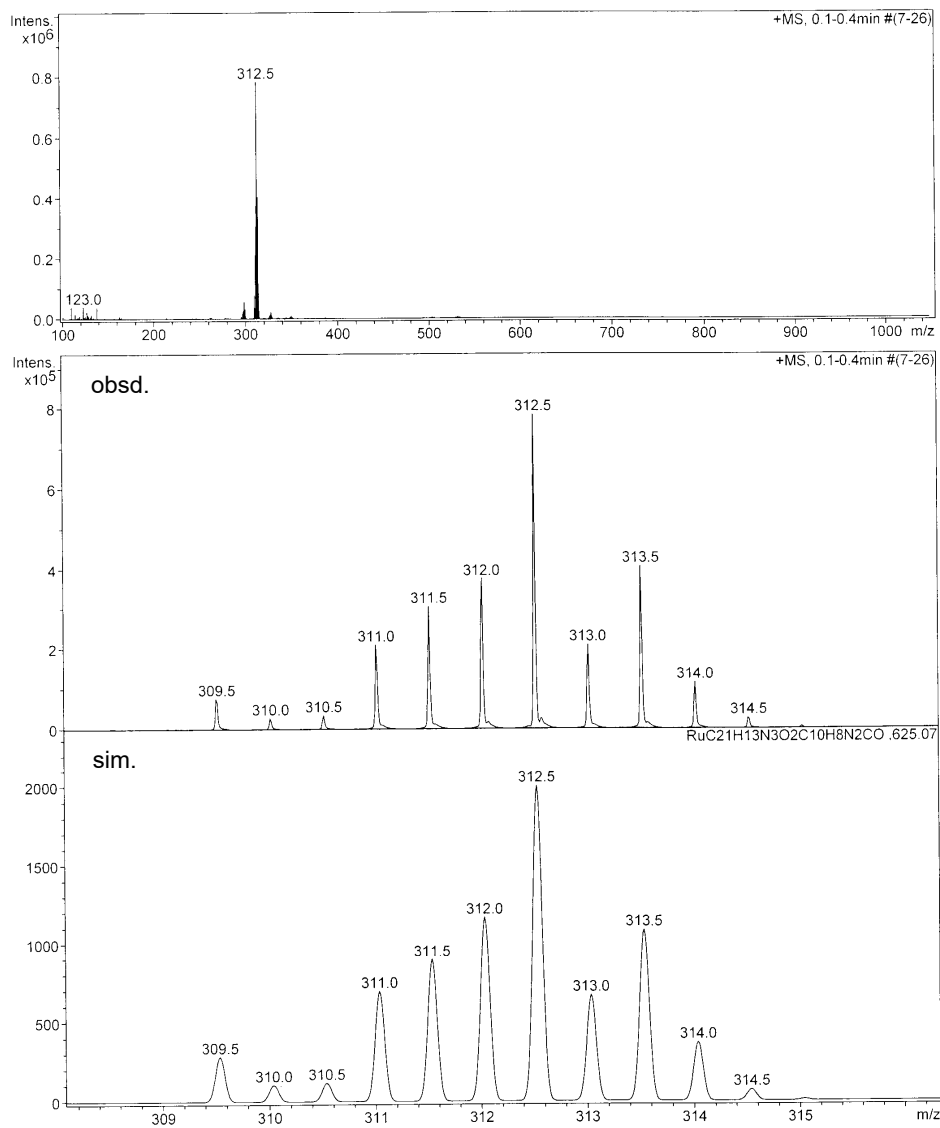

**Figure S11.** ESI mass spectrum of Q\_CO (positive mode, CH<sub>3</sub>CN).
